# Supplementary material for: The apple dihydrochalcone phloretin suppresses growth and improves chemosensitivity of breast cancer cells via inhibition of cytoprotective autophagy
Source: Royal Society of Chemistry journal article supplement (doi:10.1039/d0fo02362k), 2020-11-26
Supplement: d0fo02362k1.pdf [file d0fo02362k1.pdf]

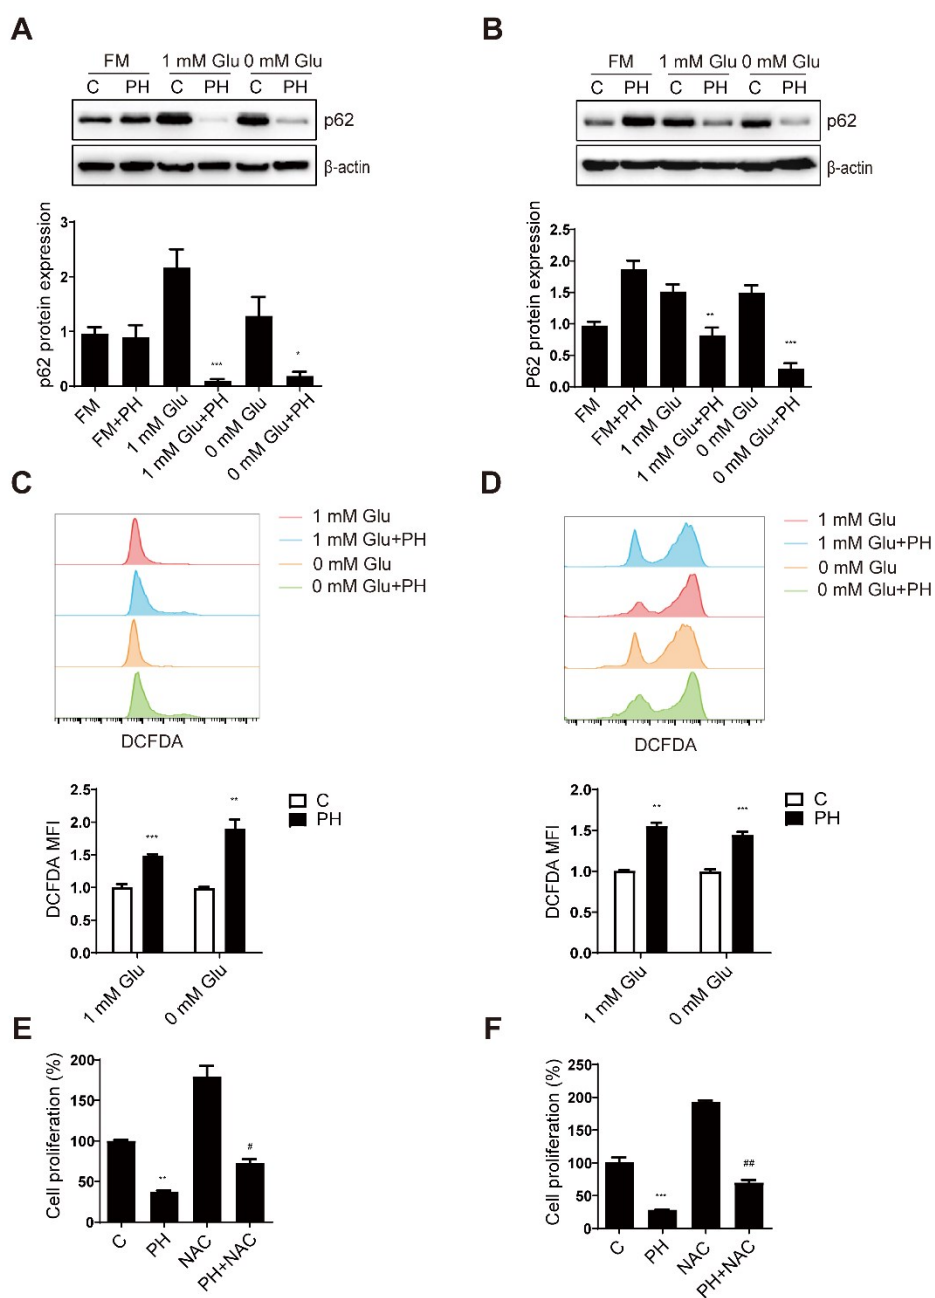

1

2 **Figure S1.** Phloretin triggered oxidative stress in breast cancer cells cultured in glucose-  
 3 limiting media. (A-B) Immunoblot analyses of p62 expression in MCF7 (A) and MDA-MB-  
 4 231 cells (B) exposed to phloretin under full media and 1 mM glucose and 0 mM glucose media.  
 5 The results from quantitative analyses were shown in the lower panels. \*\* $p < 0.01$ , \*\*\* $p < 0.001$   
 6 1 mM Glu+PH compared with 1 mM Glu, \* $p < 0.05$ , \*\*\* $p < 0.001$  0 mM Glu+PH compared with  
 7 0 mM Glu. (C-D) Flow cytometry analyses of ROS levels in MCF7 (C) and MDA-MB-231 (D)

8 cells stained with DCFH-DA after phloretin treatment in 1 mM or 0 mM glucose media.  
9 Quantitative analyses of ROS levels were shown in lower panels, respectively. \*\*p<0.01,  
10 \*\*\*p<0.001 PH compared with vehicle. (E-F) The effect of co-treatment with NAC (10 mM)  
11 and phloretin on MCF7 (E) and MDA-MB-231 (F) cell proliferation was analyzed by CCK8  
12 assay. \*\*p<0.01, \*\*\*p<0.001 PH compared with control, #p<0.05, ##p<0.01 PH+NAC  
13 compared with PH.

14  
15  
16  
17  
18  
19  
20  
21  
22  
23  
24  
25  
26  
27  
28  
29  
30  
31  
32  
33  
34  
35  
36  
37  
38  
39  
40

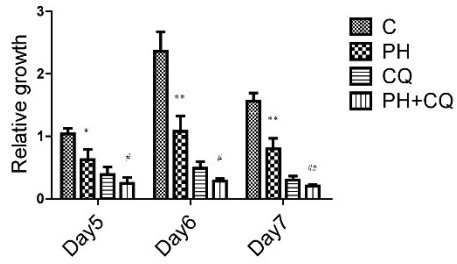

41

42 **Figure S2.** MDA-MB-231 cells were treated with phloretin and CQ for the time intervals as

43 indicated. CCK8 assay was performed. \* $p < 0.05$ , \*\* $p < 0.01$  PH versus control, # $p < 0.05$ ,

44 ## $p < 0.01$  PH+CQ versus PH.

45

46

47

48

49

50

51

52

53

54

55

56

57

58

59

60

61

62

63

64

65

66

67

68

69

70

71

72

73

74

75

76

77

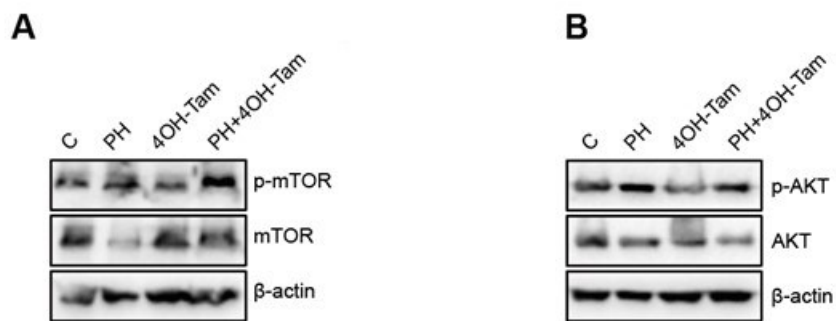

78

79 **Figure S3.** PH inhibited autophagy by modulating mTOR/AKT signaling in MCF7 re cells. (A, B)

80 Immunoblot analyses of p-mTOR, mTOR, p-AKT, and AKT expression in MCF7 re cells treated

81 with 4OH-Tam in the presence or absence of PH.

82

83

84

85

86

87

88

89

90

91

92

93

94

95

96

97

98

99

100

101

102

103

104

105

106

107

108

109  
110

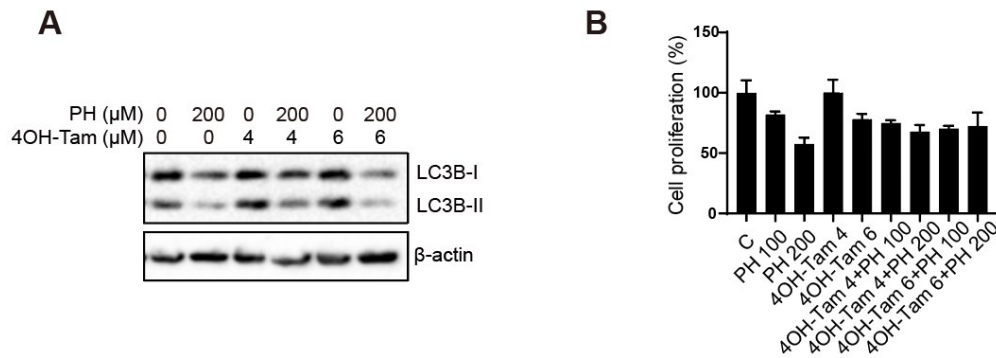

111

112 **Figure S4.** PH failed to enhance sensitivity of MCF7 parental cells to 4OH-Tam in 1 mM  
113 glucose-limiting media. (A) Immunoblot analyses of LC3B-II expression in MCF7 parental  
114 cells treated with 4OH-Tam in the presence or absence of PH. (B) MCF7 parental cells were  
115 treated with PH (100, 200  $\mu\text{M}$ ), 4OH-Tam (4, 6  $\mu\text{M}$ ) or their combinations in 1 mM Glu media  
116 and cell proliferation was measured by the CCK-8 assay.

117  
118  
119  
120  
121  
122  
123  
124  
125  
126  
127  
128  
129  
130  
131  
132  
133  
134  
135  
136  
137  
138  
139  
140  
141  
142

143  
144

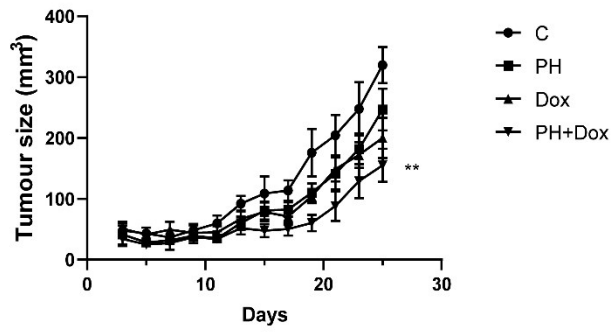

145

146 **Figure S5.** PH displayed a synergetic inhibitory effect with Dox on the growth of subcutaneous  
147 xenografts (MDA-MB-231 cells) in Balb/c nude mice. **\*\* $p < 0.01$**  compared with control.

148  
149  
150  
151  
152  
153  
154  
155  
156  
157  
158  
159  
160  
161  
162  
163  
164  
165  
166  
167  
168  
169  
170  
171  
172  
173  
174  
175  
176

177

178

179

180

181

182

183

184

185

186

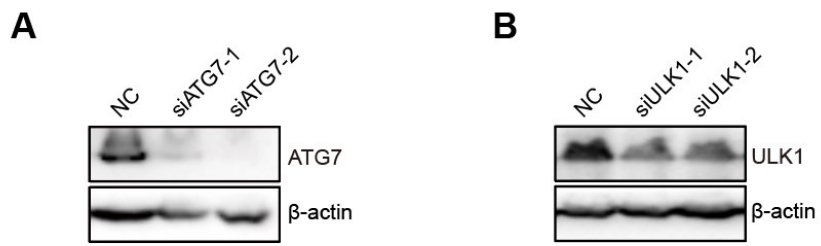

187 **Figure S6.** Validation of ATG7 and ULK1 knockdown in MCF7 re cells transfected with siATG7,

188 siULK1 or their scrambled control.

189

190
